# Supplementary material for: Rye Bread Crust as an Inducer of Antioxidant Genes and Suppressor of NF-κB Pathway In Vivo
Source: MDPI journal article supplement (doi:10.3390/nu14224790), 2022-11-12
Supplement: s1 [file s1]

Supplemental data

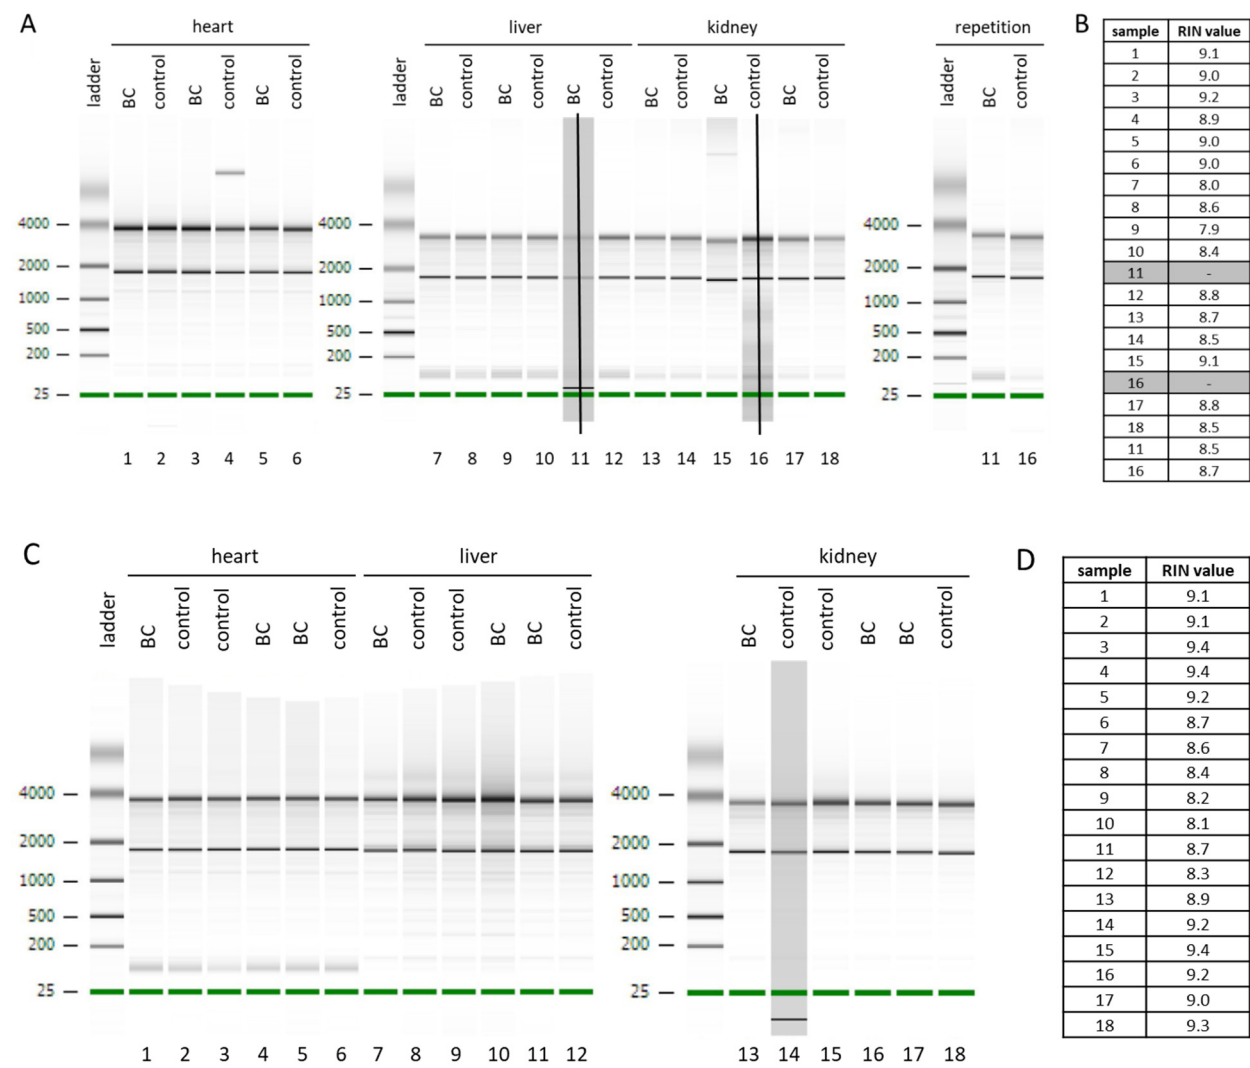

**Figure S1: RNA template examination for microarray analyses.** RNA integrity of RNA samples of BC- vs. control-fed mice ((A) 2 days' feeding, (C) 8 days' feeding) was verified by Bioanalyzer (2100 Bioanalyzer, Agilent, CA, USA). (B, D) The RNA integrity number (RIN) values of the respective samples.

## A Up-regulated (>2)

| pathway name                                      | set size | candidates contained | p-value  | q-value  |
|---------------------------------------------------|----------|----------------------|----------|----------|
| Circadian rhythm - Mus musculus (mouse)           | 30       | 3 (10.0%)            | 1.55e-05 | 0.000588 |
| miRNA regulation of DNA Damage Response           | 82       | 3 (3.7%)             | 0.00032  | 0.00607  |
| FoxO signaling pathway - Mus musculus (mouse)     | 132      | 3 (2.3%)             | 0.00128  | 0.0127   |
| Dopaminergic synapse - Mus musculus (mouse)       | 135      | 3 (2.2%)             | 0.00134  | 0.0127   |
| Thyroid cancer - Mus musculus (mouse)             | 37       | 2 (5.4%)             | 0.00168  | 0.0128   |
| Exercise-induced Circadian Regulation             | 49       | 2 (4.1%)             | 0.00294  | 0.0165   |
| Endometrial cancer - Mus musculus (mouse)         | 58       | 2 (3.4%)             | 0.00409  | 0.0165   |
| Basal cell carcinoma - Mus musculus (mouse)       | 63       | 2 (3.2%)             | 0.00481  | 0.0165   |
| Non-small cell lung cancer - Mus musculus (mouse) | 66       | 2 (3.0%)             | 0.00527  | 0.0165   |
| p53 signaling                                     | 68       | 2 (2.9%)             | 0.00558  | 0.0165   |

## B Down-regulated (<-2)

| pathway name                                 | set size | candidates contained | p-value  | q-value  |
|----------------------------------------------|----------|----------------------|----------|----------|
| Circadian rhythm - Mus musculus (mouse)      | 30       | 3 (10.0%)            | 3.37e-06 | 2.02e-05 |
| Circadian entrainment - Mus musculus (mouse) | 98       | 2 (2.0%)             | 0.00437  | 0.0131   |
| Metapathway biotransformation                | 141      | 2 (1.4%)             | 0.00885  | 0.0177   |

**Figure S2: Analyses of modulated RNAs in liver upon 8 days' feeding.** Functional annotation analyses of up-regulated (A) and down-regulated genes (B), after 8 days BC-fed mice compared to control-fed mice, for the identification of enriched pathways (cpdb.molgen.mpg.de; MM11; [10]).

| Gene Symbol | Fold Change | P-val  | Group            |
|-------------|-------------|--------|------------------|
| Ighv6-6     | 2.04        | 0.0026 | Coding           |
| Ighv1-11    | 2.08        | 0.0278 | Unassigned       |
| Ighv1-72    | 2.08        | 0.0274 | Coding           |
| Ighv1-81    | 2.31        | 0.0009 | Coding           |
| Igkv4-78    | 2.37        | 0.0339 | Multiple_Complex |
| Ighv1-79    | 2.47        | 0.0259 | Unassigned       |
| Igkv14-130  | 2.49        | 0.0145 | Coding           |
| Xlr3b       | 2.51        | 0.0031 | Multiple_Complex |
| Ctxn3       | 2.61        | 0.0104 | Coding           |
| Iglv2       | 2.73        | 0.0082 | Multiple_Complex |
| Ighv1-53    | 2.95        | 0.0269 | Coding           |
| Ighv1-73    | 2.97        | 0.0241 | Coding           |
| Igkv14-111  | 2.97        | 0.0026 | Coding           |
| Ighv1-7     | 3.03        | 0.0002 | Coding           |
| Igkv4-69    | 3.11        | 0.0114 | Coding           |
| Igkv4-56    | 3.11        | 0.0341 | Coding           |
| Igkv4-58    | 3.17        | 0.024  | Coding           |
| Igkj3       | 3.19        | 0.0288 | Multiple_Complex |
| Igkv4-60    | 3.2         | 0.0109 | Unassigned       |
| Ighv1-62-1  | 3.27        | 0.045  | Coding           |
| Igkv4-79    | 3.39        | 0.0293 | Coding           |
| Mfsd2a      | 3.49        | 0.0359 | Multiple_Complex |
| Igkv4-72    | 3.72        | 0.0151 | Coding           |
| Igkv16-104  | 3.75        | 0.009  | Coding           |
| Ighv1-19    | 3.75        | 0.0477 | Coding           |
| Ighv1-36    | 3.76        | 0.0359 | Coding           |
| Igkv4-55    | 3.86        | 0.0102 | Coding           |
| Igkv10-95   | 3.94        | 0.0233 | Coding           |
| Ighv1-85    | 4           | 0.0296 | Coding           |
| Igkv4-57    | 4.05        | 0.0127 | Coding           |
| Ighv1-47    | 4.09        | 0.0212 | Coding           |
| Igkv8-30    | 4.1         | 0.0275 | Multiple_Complex |
| Igkv4-71    | 4.2         | 0.0161 | Coding           |
| Igkv4-70    | 4.26        | 0.0137 | Coding           |
| Ighv1-5     | 4.32        | 0.0167 | Coding           |
| Ighv1-66    | 4.32        | 0.0301 | Coding           |

**Figure S3: Affected genes in the kidney of BC- vs. control-fed mice.** Significantly up-regulated genes after 8 days' BC feeding compared to control feeding (up-regulated > 2.0; < 4.37). Noncoding RNAs and pseudogenes are not included.
